1 **A high-quality *de novo* genome assembly from a single parasitoid wasp**

2 Xinhai Ye<sup>1</sup>, Yi Yang<sup>1</sup>, Zhaoyang Tian<sup>3</sup>, Le Xu<sup>1</sup>, Kaili Yu<sup>1</sup>, Shan Xiao<sup>1</sup>, Chuanlin Yin<sup>2</sup>, Shijiao

3 Xiong<sup>1</sup>, Qi Fang<sup>1</sup>, Hu Chen<sup>3,\*</sup>, Fei Li<sup>1,\*</sup>, Gongyin Ye<sup>1,\*</sup>

4

5 <sup>1</sup>State Key Laboratory of Rice Biology, Ministry of Agricultural and Rural Affairs Key Laboratory

6 of Molecular Biology of Crop Pathogens and Insect Pests & Key Laboratory of Biology of Crop

7 Pathogens and Insects of Zhejiang Province, Institute of Insect Sciences, Zhejiang University,

8 Hangzhou 310058, China.

9 <sup>2</sup>Zhejiang Provincial Key Laboratory of Biometrology and Inspection & Quarantine, College of

10 Life Sciences, China Jiliang University, Hangzhou 310018, China.

11 <sup>3</sup>Wuhan Benagen Tech Solutions Company Limited, Wuhan 430070, China.

12 \*Correspondence authors: Gongyin Ye, [chu@zju.edu.cn](mailto:chu@zju.edu.cn); Fei Li, [lifei18@zju.edu.cn](mailto:lifei18@zju.edu.cn); Hu Chen,

13 [chenhu@benagen.com](mailto:chenhu@benagen.com).

14

15

16

17

18

19

20

21

22

23

24

25

26

27

28

29

30

31 **Abstract**

32 Sequencing and assembling a genome with a single individual have several advantages, such as  
33 lower heterozygosity and easier sample preparation. However, the amount of genomic DNA of  
34 some small sized organisms might not meet the standard DNA input requirement for current  
35 sequencing pipelines. Although few studies sequenced a single small insect with about 100 ng  
36 DNA as input, it may still be challenging for many small organisms to obtain such amount of  
37 DNA from a single individual. Here, we use 20 ng DNA as input, and present a high-quality  
38 genome assembly for a single haploid male parasitoid wasp (*Habrobracon hebetor*) using  
39 Nanopore and Illumina. Because of the low input DNA, a whole genome amplification (WGA)  
40 method is used before sequencing. The assembled genome size is 131.6 Mb with a contig N50 of  
41 1.63 Mb. A total of 99% Benchmarking Universal Single-Copy Orthologs are detected, suggesting  
42 the high level of completeness of the genome assembly. Genome comparison between *H. hebetor*  
43 and its relative *Bracon brevicornis* shows a high-level genome synteny, indicating the genome of  
44 *H. hebetor* is highly accurate and contiguous. Our study provides an example for *de novo*  
45 assembling a genome from ultra-low input DNA, and will be used for sequencing projects of  
46 small sized species and rare samples, haploid genomics as well as population genetics of small  
47 sized species.

48

49

50

51

52

53

54

55

56

57

58

59

60

## 61 **Introduction**

62 A high-quality genome assembly is one of the most important resources for studying biological  
63 questions in organisms. However, genome sequencing and assembly can be complicated by the  
64 small body size of many organisms (i.e., very low genomic DNA from a single individual) and  
65 high heterozygosity [1, 2]. In particular, many arthropod (insect) genome projects face these  
66 problems, and obtain highly fragmented genomes with very low Contig N50 or/and Scaffold N50  
67 value [1]. These fragmented genomes will have problems in genome annotation, as some genes  
68 are incomplete in genome assembly. In addition, gene synteny analysis, chromosome evolution,  
69 quantitative trait locus mapping also will fail in such fragmented genomes [1].

70 Mostly, the amount of genomic DNA is very low when obtained from single small-sized  
71 insect, which makes it hard to meet the standard DNA input requirement of long-reads sequencing  
72 (Pacbio or Nanopore) or even short-reads sequencing (Illumina) [1, 3-6]. Over the past two  
73 decades, many insects with small body size (e. g., parasitoid wasps, aphids, many *Drosophila*)  
74 were sequenced by using the DNA from pooled samples [2]. But pooling method raises  
75 heterozygosities in genomic regions, which will be assembled into more fragmented contigs. To  
76 reduce the heterozygosity level in pooled sample, inbreeding species were used for DNA  
77 extraction and sequencing in many cases [1, 7, 8]. Using the current hybrid genome sequencing  
78 and assembly approaches, many high-quality genome assemblies (some are chromosome-level  
79 genomes) were released [9]. However, most of insects are difficult to collect or cannot be well  
80 reared in the lab. Even if they can be reared in the lab, they might be difficult to inbreed [1, 3, 6].  
81 Therefore, obtaining a high-quality genome assembly is still a problem for some small sized  
82 species and rare species in the wild.

83 Recently, to resolve these problems, some approaches were developed in sequencing from a  
84 single individual with low DNA input. Kingan et al. reported a genome assembly from a single  
85 mosquito (about 100 ng genomic DNA), *Anopheles coluzzii*, sequenced with three PacBio SMRT  
86 Cells [6]. Adams et al. developed a hybrid method (Illumina, Nanopore and Hi-C) to obtain a  
87 chromosome-level genome assembly from a single *Drosophila melanogaster* (totally ~200ng  
88 genomic DNA) [10]. These two studies provided good examples for sequencing a single small  
89 insect, but obtaining about 100 ng DNA from a single individual may still be challenging for many  
90 small insects such as parasitoid wasps.

91           How to sequence and assemble a high-quality genome from a single insect with ultra-low  
92 input DNA is still a problem, and no practical experience in this field up to now. Because of the  
93 ultra-low input DNA, it is difficult to construct library for sequencing at this time. A whole  
94 genome amplification (WGA) method has to be used to increase the total amount of DNA to meet  
95 the lowest requirement of sequencing library construction [11]. The WGA method is widely used  
96 to identify single-nucleotide polymorphisms, copy number variations in low DNA sample, e. g.  
97 single cell [12, 13]. However, this method is rarely used in *de novo* genome assembly. It is  
98 important to note that WGA has some disadvantages, such as potential amplification biases and  
99 contaminant problems [12, 14-16], which might influence the quality of genome assembly. There  
100 are only a few cases on *de novo* genome assembly based on WGA data, most of them are in  
101 bacteria [17, 18]. Recently, WGA was used to build a *de novo* genome assembly for a fungus [19].  
102 But there is no report about WGA application in *de novo* genome assembly in insects or other  
103 more complex eukaryotic species.

104           Here, starting with 20 ng DNA, we present a high-quality *de novo* genome assembly of a  
105 single male parasitoid wasp (*Habrobracon hebetor*) using WGA and Nanopore, Illumina  
106 sequencing. This approach provides an example for genome sequencing and assembly using  
107 ultra-low DNA input, and is applicable for small size organisms and rare samples.

108

## 109 **Results and discussion**

### 110 **Parasitoid wasp for sequencing**

111 Parasitoid wasps are interesting and important organisms for studying fundamental biological  
112 questions such as evolution and sex determination, and some of them are important natural  
113 enemies for insect pest management [20, 21]. In addition, parasitoid wasps are often in very small  
114 size, which makes the genome projects of them complicated. Although many studies have  
115 assembled genomes from pooled inbred lab strains [8, 22-27], most of parasitoid wasps are  
116 difficult to be reared in the lab to establish such lab strains for sequencing. There are also some  
117 problems and uncertain factors in sequencing field collected samples, such as high heterozygosity  
118 and insufficient sample. These issues are major hindrances to the development of parasitoid wasp  
119 genomics. To test the feasibility of sequencing and assembling genome from a single parasitoid  
120 wasp, we sequenced a single male adult wasp of *H. hebetor* (Braconidae) in the study. *H. hebetor*

121 wasp is an important biological control agent for managing multiple lepidopteran pests [28], and  
122 an ideal model for Hymenoptera sex determination researches [29, 30].

123

#### 124 **Genome sequencing**

125 In total, 102 ng high molecular weight DNA was extracted from a single male adult wasp of *H.*  
126 *hebetor*. Two studies already had provided good cases to obtain a high-quality genome assembly  
127 with approximately 100 ng of DNA [6, 10]. However, it still might be difficult to obtain ~100 ng  
128 DNA from a single individual in many small sized species. To challenge the lower input DNA for  
129 sequencing and make our method useful for more small size species, only 20 ng DNA was used  
130 for subsequent study.

131 DNA was subjected to whole genome amplification, yielding ~4.37 µg amplified DNA. 2.02  
132 µg amplified DNA was used for Nanopore sequencing. In total, we obtained 51 Gb high-quality  
133 reads (~372X, genome size is about 137 Mb) from a single Oxford Nanopore Technology (ONT)  
134 PromethION flow cell (Table. S1). According to the handbook of this WGA method, the average  
135 amplified product length is in a range between 2 kb and 100 kb. The distribution of the Nanopore  
136 reads showed the similar pattern (Table. S1 and Figure. S1). The average length of total reads is  
137 4,484 bp, and the N50 of total reads is 7,311 bp. We also generated 13.8 Gb Illumina clean data  
138 reads using the rest of amplified DNA (Table. S2).

139

#### 140 **Genome assembly**

141 We assembled a genome assembly using Flye [31, 32] with ~250X >5K Nanopore reads. This  
142 assembly was then corrected and polished by both Nanopore reads and Illumina reads. The final  
143 assembly size is 131.6 Mb, consisting of 765 contigs with a Contig N50 of 1.63 Mb (Table 1). The  
144 GC content of the genome assembly is 35.49%. Assembly statistic of *H. hebetor* are compared to  
145 four additional braconid genomes, and the result shows a higher N50 value of *H. hebetor* than  
146 *Fopius arisanus* (0.98 Mb) [33], *Diachasma alloeum* (0.65 Mb) [23], *Macrocentrus cingulum*  
147 (0.19 Mb) [26] and *Microplitis demolitor* (1.1 Mb) [34]. Our analysis indicates that this assembly  
148 of a single wasp is more continuous than most wasp genomes which generated by pooled samples.

149

#### 150 **Genome quality assessment**

151 The completeness of the assembly was assessed by using Benchmarking Universal Single-Copy  
152 Orthologs (BUSCO) [35], 1,643 out of 1,658 (99%) conserved arthropod genes were found in the  
153 genome, 97.3% occurred as single copies (Table 2). The complete and duplicated BUSCO  
154 component of the genome was 1.7%. Only three BUSCOs (0.2%) were found fragmented in the  
155 genome. There are still twelve BUSCOs (0.8%) cannot be deleted in this genome. We also  
156 mapped the Illumina paired-end genomic sequencing reads to the assembled genome, 99.27% of  
157 reads could be mapped to the genome. These results indicate that the genome assembly is both  
158 highly accurate and near completion.

159 We next mapped *H. hebetor* genome to a genome of *Bracon brevicornis* which is a close  
160 relative of *H. hebetor*. The mapping result shows a high-level genome synteny between these two  
161 wasps, suggesting the genome assembly of *H. hebetor* obtained from a single wasp is accurate and  
162 contiguous (Figure 1). From these results, we didn't find the evidence to support that  
163 amplification biases of WGA could largely influence the quality of genome assembly. We  
164 reasoned that might due to the relatively small size genome of parasitoid wasps.

165 In summary, we report a high-quality genome assembly of a single parasitoid wasp *H.*  
166 *hebetor* (~20 ng starting DNA) using WGA, Nanopore and Illumina sequencing technologies.  
167 This study presents an example for *de novo* assembling a genome from ultra-low input DNA,  
168 which could be used for many small sized species sequencing projects, haploid genomics and  
169 population genetics of small sized species.

170

## 171 **Methods**

### 172 **DNA extraction and whole genome amplification**

173 High molecular weight DNA was extracted from a single male adult *H. hebetor* using TIANamp  
174 Micro DNA Kit (DP316) following manufacturer's recommendations. Two DNA quantification  
175 methods Qubit and Nanodrop were used to measure DNA concentration. Then, ~20 ng genomic  
176 DNA was amplified using a whole-genome amplification (WGA) kit according to the  
177 manufacturer's instructions (Qiagen REPLI-g Mini Kit, Qiagen, Valencia, CA). The REPLI-g Kit  
178 is developed based on multiple displacement amplification (MDA), a WGA method with high  
179 processivity and low error rate [36, 37]. Purified genomic DNA was firstly mixed with a  
180 denaturation buffer by vortexing and centrifuge briefly. This reaction was quenched by 3 min

181 incubation (at room temperature) with neutralization buffer. The master mix components with  
182 REPLI-g Mini DNA Polymerase were added to denatured DNA. The amplification step performed  
183 by incubation at 30°C for 16 hours. Next, REPLI-g Mini DNA Polymerase was inactivated by  
184 heating the sample for 3 min at 65°C. Following WGA, DNA concentration was determined by  
185 using Qubit.

186

### 187 **Nanopore sequencing**

188 A total amount of 2.02 µg DNA was used as input for ONT 1D library construction and  
189 sequencing. In brief, the gDNA was sheared using the Megaruptor. Then, the large fragments were  
190 selected and purified using AMPure beads. A ONT 1D sequencing library was prepared using the  
191 Nanopore Ligation Sequencing Kit (SQK-LSK109; Oxford Nanopore, Oxford, UK) and was  
192 sequenced on ONT PromethION 24 platform with one nanopore flow cell (FLO-PRO002).

193

### 194 **Illumina sequencing**

195 Sequencing library was generated using Truseq Nano DNA HT Sample preparation Kit (Illumina  
196 USA) following manufacturer's recommendations. Briefly, the DNA firstly sheared by Covaris S2  
197 system (Covaris, Inc. Woburn, MA, USA), then DNA fragments were end polished, A-tailed, and  
198 ligated with the full-length adapter for Illumina sequencing with further PCR amplification. At last,  
199 PCR products were purified (AMPure XP system) and libraries were analyzed for size distribution  
200 by Agilent2100 Bioanalyzer and quantified using real-time PCR. The final library was sequenced  
201 by Illumina NovaSeq platform.

202

### 203 **Genome assembly**

204 Nanopore long reads flagged as “passing” were corrected by NECAT  
205 (<https://github.com/xiaochuanle/NECAT>). Flye (version: 2.7.1-b1590) [31, 32] was used to  
206 assemble the genome with default parameters using >5K Nanopore reads (~250X). Then, Racon  
207 (<https://github.com/isovic/racon>) was used for correcting the assembly. In addition, iterative  
208 polishing was conducted using Pilon (version: 1.22) [38] with adapter-trimmed paired-end  
209 Illumina reads. The Pilon program was run with default parameters to fix bases, fill gaps, and  
210 correct local misassemblies.

211

## 212 **Evaluation**

213 Benchmarking Universal Single-Copy Orthologs method (BUSCO version 4.0) [35] was used to  
214 search the 1,658 bench-marking universal single-copy orthologous genes in *insecta\_odb9*.

215

## 216 **Genome comparison**

217 An online tool D-GENIES [39] was used to compare the *H. hebetor* and *B. brevicornis* genome  
218 [40].

219

## 220 **Data availability**

221 All sequence data are available at the NCBI, Bioproject number PRJNA644201.

222

## 223 **Acknowledgements**

224 This work was supported by Key Program of National Natural Science Foundation of China  
225 (NSFC) (Grant no. 31830074 to GYY), Major International (Regional) Joint Research Project of  
226 NSFC (Grant no. 31620103915 to GYY), XHY and LX thank “Academic Star” Program for Ph. D  
227 Student of Zhejiang University for support. XHY thanks the China Scholarship Council (No.  
228 201906320376) for its support during his research period in the Rochester, New York, US. We  
229 thank Prof. John H. Werren (University of Rochester) for valuable discussions.

230

## 231 **Author contributions**

232 GYY conceived and designed the works, and supervised the project. GYY, FL and QF coordinated  
233 the project. KLY and SJX prepared the samples for sequencing. XHY, ZYT, HC sequenced and  
234 assembled the genome. XHY and YY performed the bioinformatics analysis. XHY wrote the draft  
235 manuscript. YY, LX, SX, CLY, HC, FL, QF and GYY improved and revised the manuscript. All  
236 authors read and approved the final manuscript.

237

## 238 **Conflict of interest statement**

239 The authors declare no competing interests.

240



241 Table 1. Information of the genome assembly.

| Statistic                   | <i>Habrobracon hebetor</i> |
|-----------------------------|----------------------------|
| Total length (bp)           | 131,644,965                |
| Total length without N (bp) | 131,644,965                |
| Contig number               | 765                        |
| GC content (%)              | 35.49                      |
| Contig N50 (bp)             | 1,625,734                  |
| Contig N90 (bp)             | 140,615                    |
| Average (bp)                | 172,084.92                 |
| Median (bp)                 | 9,847.00                   |
| Min (bp)                    | 177                        |
| Max (bp)                    | 7,063,052                  |

242

243 Table 2. BUSCO assessment of the final assembly.

| Category                            | Number of BUSCOs |
|-------------------------------------|------------------|
| Complete BUSCOs (C)                 | 1,643 (99.0%)    |
| Complete and single-copy BUSCOs (S) | 1,614 (97.3%)    |
| Complete and duplicated BUSCOs (D)  | 29 (1.7%)        |
| Fragmented BUSCOs (F)               | 3 (0.2%)         |
| Missing BUSCOs (M)                  | 12 (0.8%)        |
| Total BUSCO genes                   | 1,658 (100%)     |

244

245

246

247

248

249

250

251

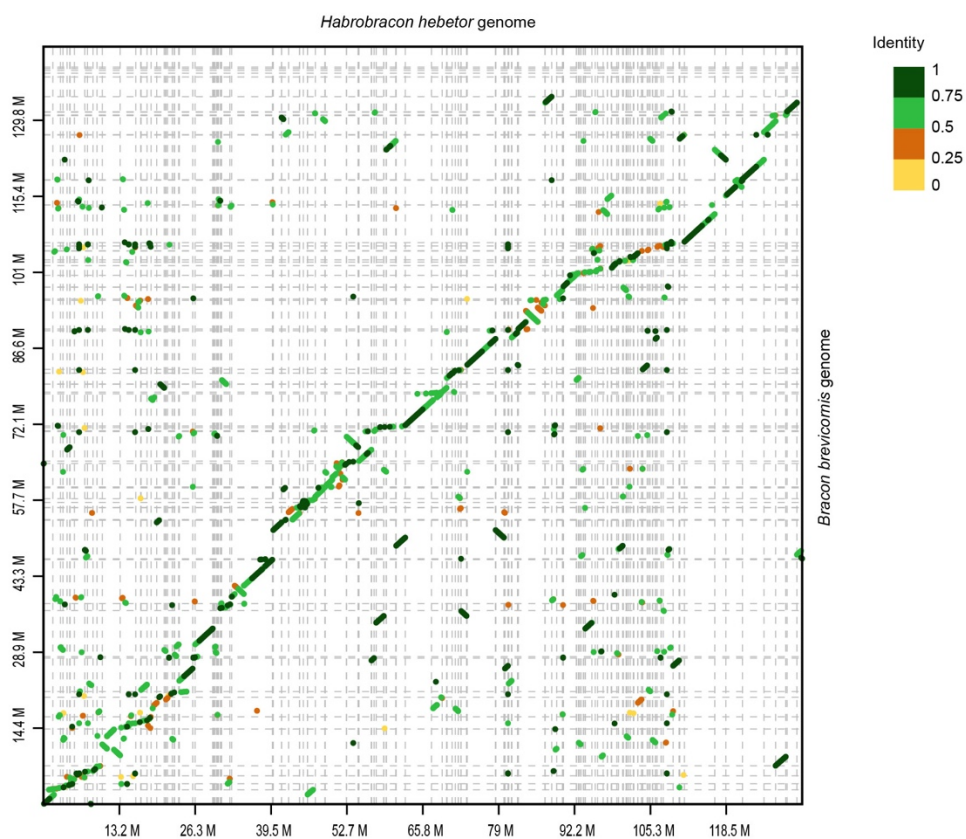

252

253 Figure 1. Genome comparison between *H. hebetor* and *B. brevicornis* genome.

254

255

256

257

258

259

260

261

262

263

264

265

266

267

268 Table S1. Nanopore sequencing data.

| Type    | TotalBase      | TotalReads | MaxLen  | AvgLen  | N50     | N90     | meanQ |
|---------|----------------|------------|---------|---------|---------|---------|-------|
| >0      | 51,597,252,675 | 11,507,945 | 124,237 | 4,484   | 7,311   | 2,127   | 11    |
| >2000   | 46,957,240,951 | 7,372,598  | 124,237 | 6,369   | 8,039   | 3,113   | 11    |
| >5000   | 34,318,006,006 | 3,510,066  | 124,237 | 9,777   | 10,379  | 5,877   | 11    |
| >10000  | 18,071,218,227 | 1,193,518  | 124,237 | 15,141  | 14,941  | 10,769  | 11    |
| >20000  | 4,376,715,930  | 170,092    | 124,237 | 25,731  | 24,876  | 20,737  | 11    |
| >100000 | 534,472        | 5          | 124,237 | 106,894 | 102,023 | 100,525 | 10    |

269

270 Table S2. Illumina sequencing data.

| Raw Reads  | Clean Reads | Clean Base (Gb) | Q20(%) | Q30(%) | GC Content (%) |
|------------|-------------|-----------------|--------|--------|----------------|
| 46,619,030 | 46,061,685  | 13.82           | 95.51  | 91.23  | 35.27          |

271

272

273

274

275

276

277

278

279

280

281

282

283

284

285

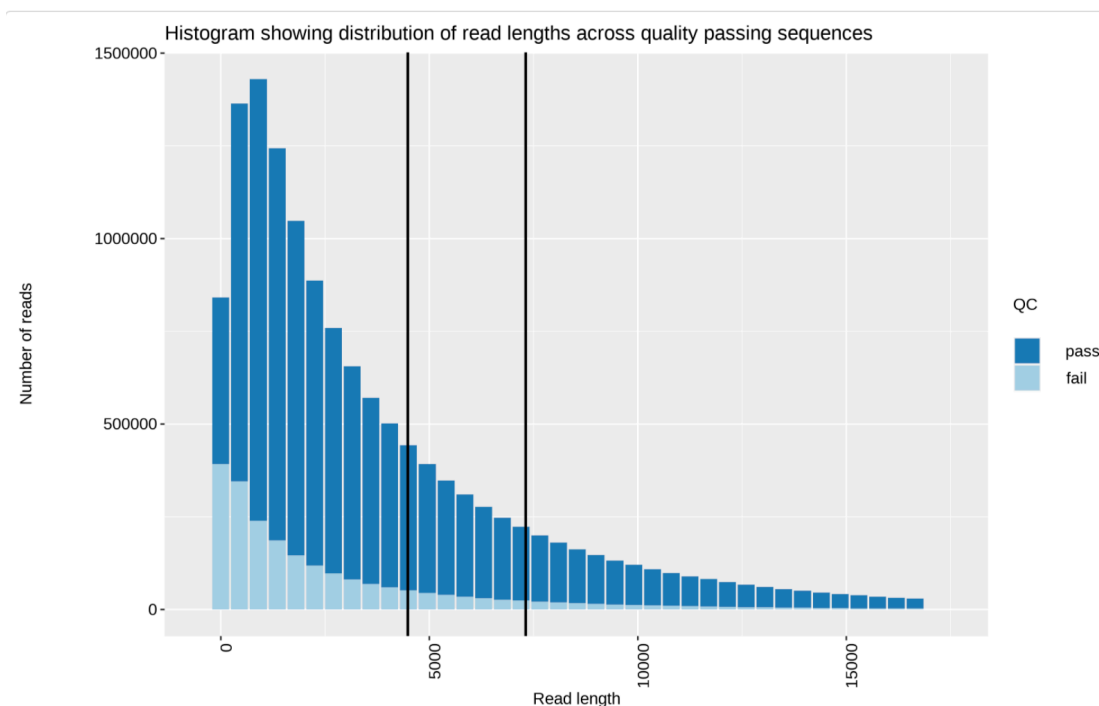

286

287 Figure S1. Distribution of the Nanopore reads.

288

289

290

291

292

293

294

295

296

297

298

299

300

301

302

303

304

305 **References:**

- 306 1. Richards S, Murali SC: **Best practices in insect genome sequencing: what works and what**  
307 **doesn't.** *Curr Opin Insect Sci* 2015, **7**:1-7.
- 308 2. Li F, Zhao X, Li M, He K, Huang C, Zhou Y, Li Z, Walters JR: **Insect genomes: progress**  
309 **and challenges.** *Insect Mol Biol* 2019, **28**:739-758.
- 310 3. Kingan SB, Urban J, Lambert CC, Baybayan P, Childers AK, Coates B, Scheffler B, Hackett  
311 K, Korlach J, Geib SM: **A high-quality genome assembly from a single, field-collected**  
312 **spotted lanternfly (*Lycorma delicatula*) using the PacBio Sequel II system.** *Gigascience*  
313 2019, **8**.
- 314 4. Panfilio KA, Vargas Jentsch IM, Benoit JB, Erezyilmaz D, Suzuki Y, Colella S, Robertson  
315 HM, Poelchau MF, Waterhouse RM, Ioannidis P, et al: **Molecular evolutionary trends and**  
316 **feeding ecology diversification in the Hemiptera, anchored by the milkweed bug genome.**  
317 *Genome Biol* 2019, **20**:64.
- 318 5. Thomas GWC, Dohmen E, Hughes DST, Murali SC, Poelchau M, Glastad K, Anstead CA,  
319 Ayoub NA, Batterham P, Bellair M, et al: **Gene content evolution in the arthropods.**  
320 *Genome Biol* 2020, **21**:15.
- 321 6. Kingan SB, Heaton H, Cudini J, Lambert CC, Baybayan P, Galvin BD, Durbin R, Korlach J,  
322 Lawniczak MKN: **A high-quality de novo genome assembly from a single mosquito using**  
323 **PacBio Sequencing.** *Genes (Basel)* 2019, **10**.
- 324 7. Adams MD, Celniker SE, Holt RA, Evans CA, Gocayne JD, Amanatides PG, Scherer SE, Li  
325 PW, Hoskins RA, Galle RF, et al: **The genome sequence of *Drosophila melanogaster*.**  
326 *Science* 2000, **287**:2185-2195.
- 327 8. Werren JH, Richards S, Desjardins CA, Niehuis O, Gadau J, Colbourne JK, Nasonia Genome  
328 Working G, Werren JH, Richards S, Desjardins CA, et al: **Functional and evolutionary**  
329 **insights from the genomes of three parasitoid *Nasonia* species.** *Science* 2010, **327**:343-348.
- 330 9. Rice ES, Green RE: **New approaches for genome assembly and scaffolding.** *Annu Rev*  
331 *Anim Biosci* 2019, **7**:17-40.
- 332 10. Adams M, McBroome J, Maurer N, Pepper-Tunick E, Saremi NF, Green RE, Vollmers C,  
333 Corbett-Detig RB: **One fly-one genome: chromosome-scale genome assembly of a single**  
334 **outbred *Drosophila melanogaster*.** *Nucleic Acids Res* 2020.
- 335 11. Czyz ZT, Kirsch S, Polzer B: **Principles of whole-genome amplification.** *Methods Mol Biol*  
336 2015, **1347**:1-14.
- 337 12. de Bourcy CF, De Vlaminc I, Kanbar JN, Wang J, Gawad C, Quake SR: **A quantitative**  
338 **comparison of single-cell whole genome amplification methods.** *PLoS One* 2014,  
339 **9**:e105585.
- 340 13. Macaulay IC, Voet T: **Single cell genomics: advances and future perspectives.** *PLoS Genet*  
341 2014, **10**:e1004126.
- 342 14. Lack JB, Weider LJ, Jeyasingh PD: **Whole genome amplification and sequencing of a**  
343 ***Daphnia* resting egg.** *Mol Ecol Resour* 2018, **18**:118-127.
- 344 15. Ahsanuddin S, Afshinnekoo E, Gandara J, Hakyemezoglu M, Bezdán D, Minot S, Greenfield  
345 N, Mason CE: **Assessment of REPLI-g multiple displacement whole genome**  
346 **amplification (WGA) techniques for metagenomic applications.** *J Biomol Tech* 2017,  
347 **28**:46-55.
- 348 16. Sabina J, Leamon JH: **Bias in whole genome amplification: causes and considerations.**

- 349 *Methods Mol Biol* 2015, **1347**:15-41.
- 350 17. Rodrigue S, Malmstrom RR, Berlin AM, Birren BW, Henn MR, Chisholm SW: **Whole**  
351 **genome amplification and de novo assembly of single bacterial cells.** *PLoS One* 2009,  
352 **4**:e6864.
- 353 18. Roux S, Trubl G, Goudeau D, Nath N, Couradeau E, Ahlgren NA, Zhan Y, Marsan D, Chen F,  
354 Fuhrman JA, et al: **Optimizing de novo genome assembly from PCR-amplified**  
355 **metagenomes.** *PeerJ* 2019, **7**:e6902.
- 356 19. Montoliu-Nerin M, Sanchez-Garcia M, Bergin C, Grabherr M, Ellis B, Kutschera VE,  
357 Kierczak M, Johannesson H, Rosling A: **Building de novo reference genome assemblies of**  
358 **complex eukaryotic microorganisms from single nuclei.** *Sci Rep* 2020, **10**:1303.
- 359 20. Heraty J: **Parasitoid diversity and insect pest management.** In R. G. Foottit & P. H. Adler  
360 (Eds.), *Insect biodiversity: Science and society* (pp. 445–462). Hoboken, NJ:  
361 Wiley-Blackwell.
- 362 21. Quicke, DLJ: **Parasitic Wasps.** 1997. London, UK: Chapman & Hall.
- 363 22. Lindsey ARI, Kelkar YD, Wu X, Sun D, Martinson EO, Yan Z, Rugman-Jones PF, Hughes  
364 DST, Murali SC, Qu J, et al: **Comparative genomics of the miniature wasp and pest**  
365 **control agent *Trichogramma pretiosum*.** *BMC Biol* 2018, **16**:54.
- 366 23. Tvedte ES, Walden KKO, McElroy KE, Werren JH, Forbes AA, Hood GR, Logsdon JM,  
367 Feder JL, Robertson HM: **Genome of the parasitoid wasp *Diachasma alloenum*, an**  
368 **emerging model for ecological speciation and transitions to asexual reproduction.**  
369 *Genome Biol Evol* 2019, **11**:2767-2773.
- 370 24. Martinson EO, Mrinalini, Kelkar YD, Chang CH, Werren JH: **The evolution of venom by**  
371 **co-option of single-copy genes.** *Curr Biol* 2017, **27**:2007-2013 e2008.
- 372 25. Xiao JH, Yue Z, Jia LY, Yang XH, Niu LH, Wang Z, Zhang P, Sun BF, He SM, Li Z, et al:  
373 **Obligate mutualism within a host drives the extreme specialization of a fig wasp genome.**  
374 *Genome Biology* 2013, **14**.
- 375 26. Yin C, Li M, Hu J, Lang K, Chen Q, Liu J, Guo D, He K, Dong Y, Luo J, et al: **The genomic**  
376 **features of parasitism, polyembryony and immune evasion in the endoparasitic wasp**  
377 ***Macrocentrus cingulum*.** *BMC Genomics* 2018, **19**:420.
- 378 27. Ye X, Yan Z, Yang Y, Xiao S, Chen L, Wang J, Wang F, Xiong S, Mei Y, Wang F, et al: **A**  
379 **chromosome-level genome assembly of the parasitoid wasp *Pteromalus puparum*.** *Mol*  
380 *Ecol Resour* 2020.
- 381 28. Katayama Y, Suzuki T, Ebisawa T, Ohtsuka J, Wang S, Natsume R, Lo YH, Senda T,  
382 Nagamine T, Hull JJ, et al: **A class-A GPCR solubilized under high hydrostatic pressure**  
383 **retains its ligand binding ability.** *Biochim Biophys Acta* 2016, **1858**:2145-2151.
- 384 29. Whiting PW: **Multiple alleles in complementary sex determination of *Habrobracon*.**  
385 *Genetics* 1943, **28**:365-382.
- 386 30. Snell GD: **The determination of sex in *Habrobracon*.** *Proc Natl Acad Sci U S A* 1935,  
387 **21**:446-453.
- 388 31. Kolmogorov M, Yuan J, Lin Y, Pevzner PA: **Assembly of long, error-prone reads using**  
389 **repeat graphs.** *Nat Biotechnol* 2019, **37**:540-546.
- 390 32. Lin Y, Yuan J, Kolmogorov M, Shen MW, Chaisson M, Pevzner PA: **Assembly of long**  
391 **error-prone reads using de Bruijn graphs.** *Proc Natl Acad Sci U S A* 2016,  
392 **113**:E8396-E8405.

- 393 33. Geib SM, Liang GH, Murphy TD, Sim SB: **Whole genome sequencing of the braconid**  
394 **parasitoid wasp *Fopius arisanus*, an important biocontrol agent of pest tephritid fruit flies.**  
395 *G3 (Bethesda)* 2017, **7**:2407-2411.
- 396 34. Burke GR, Walden KKO, Whitfield JB, Robertson HM, Strand MR: **Whole Genome**  
397 **Sequence of the parasitoid wasp *Microplitis demolitor* that harbors an endogenous virus**  
398 **mutualist.** *G3 (Bethesda)* 2018, **8**:2875-2880.
- 399 35. Waterhouse RM, Seppely M, Simao FA, Manni M, Ioannidis P, Klioutchnikov G, Kriventseva  
400 EV, Zdobnov EM: **BUSCO applications from quality assessments to gene prediction and**  
401 **phylogenomics.** *Mol Biol Evol* 2017.
- 402 36. Hosono S, Faruqi AF, Dean FB, Du Y, Sun Z, Wu X, Du J, Kingsmore SF, Egholm M, Lasken  
403 RS: **Unbiased whole-genome amplification directly from clinical samples.** *Genome Res*  
404 2003, **13**:954-964.
- 405 37. Han T, Chang CW, Kwekel JC, Chen Y, Ge Y, Martinez-Murillo F, Roscoe D, Tezak Z, Philip  
406 R, Bijwaard K, Fuscoe JC: **Characterization of whole genome amplified (WGA) DNA for**  
407 **use in genotyping assay development.** *BMC Genomics* 2012, **13**:217.
- 408 38. Walker BJ, Abeel T, Shea T, Priest M, Abouelliel A, Sakthikumar S, Cuomo CA, Zeng Q,  
409 Wortman J, Young SK, Earl AM: **Pilon: an integrated tool for comprehensive microbial**  
410 **variant detection and genome assembly improvement.** *PLoS One* 2014, **9**:e112963.
- 411 39. Cabanettes F, Klopp C: **D-GENIES: dot plot large genomes in an interactive, efficient and**  
412 **simple way.** *PeerJ* 2018, **6**:e4958.
- 413 40. Pannebakker drirBA, Ferguson, KB: **The Bracon brevicornis genome, supporting data.**  
414 *DANS* 2019.
